# Supplementary material for: Risk Factors for Incarceration in Patients with Primary Abdominal Wall and Incisional Hernias: A Prospective Study in 4472 Patients
Source: Springer Nature journal article supplement (doi:10.1007/s00268-019-04989-x), 2019-04-12
Supplement: MOESM1 [file 16652532]

**Supplemental table 1 overview of missing data**

| Variable                                          | Primary hernia   |              | Incisional hernia |              |
|---------------------------------------------------|------------------|--------------|-------------------|--------------|
|                                                   | Not incarcerated | Incarcerated | Not incarcerated  | Incarcerated |
|                                                   | N (%)            | N (%)        | N (%)             | N (%)        |
| <b>Total N</b>                                    | 2352 (100)       | 83 (3.5)     | 2041 (100)        | 79 (3.9)     |
| <b>Patient baseline characteristics</b>           |                  |              |                   |              |
| Age                                               | 8 (0.4)          | 1 (1.2)      | 10 (0.5)          | 0 (0)        |
| BMI                                               | 22 (1.0)         | 1 (1.2)      | 18 (0.9)          | 4 (5.1)      |
| Sex = female                                      | 0 (0)            | 0 (0)        | 0 (0)             | 0 (0)        |
| Current smoking                                   | 41 (1.8)         | 4 (4.8)      | 104 (5.1)         | 5 (6.3)      |
| Diabetes mellitus                                 | 23 (1.0)         | 0 (0)        | 38 (1.9)          | 3 (3.8)      |
| Corticosteroid use                                | 23 (1.0)         | 0 (0)        | 38 (1.9)          | 3 (3.8)      |
| Radiotherapy                                      | 23 (1.0)         | 0 (0)        | 38 (1.9)          | 3 (3.8)      |
| Chemotherapy                                      | 23 (1.0)         | 0 (0)        | 38 (1.9)          | 3 (3.8)      |
| History of AAA                                    | 12 (0.5)         | 0 (0)        | 11 (0.5)          | 1 (1.3)      |
| Collagen disorder                                 | 12 (0.5)         | 0 (0)        | 11 (0.5)          | 1 (1.3)      |
| Anticoagulant use                                 | 23 (1.0)         | 0 (0)        | 38 (1.9)          | 3 (3.8)      |
| History of abdominal wall hernia                  | 12 (0.5)         | 0 (0)        | 11 (0.5)          | 1 (1.3)      |
| History of inguinal hernia                        | 12 (0.5)         | 0 (0)        | 11 (0.5)          | 1 (1.3)      |
| History of primary ventral hernia                 | 12 (0.5)         | 0 (0)        | 11 (0.5)          | 1 (1.3)      |
| History of incisional hernia                      | 12 (0.5)         | 0 (0)        | 11 (0.5)          | 1 (1.3)      |
| Family history of abdominal hernia                | 12 (0.5)         | 0 (0)        | 11 (0.5)          | 1 (1.3)      |
| ASA-score                                         | 17 (0.7)         | 1 (1.2)      | 6 (0.3)           | 3 (3.8)      |
| <b>Primary surgery</b>                            |                  |              |                   |              |
| Gastro-intestinal                                 | NA               | NA           | 25 (1.2)          | 3 (3.8)      |
| Gynaecologic                                      | NA               | NA           | 25 (1.2)          | 3 (3.8)      |
| Other surgery                                     | NA               | NA           | 25 (1.2)          | 3 (3.8)      |
| <b>Factors related to intraabdominal pressure</b> |                  |              |                   |              |
| Ascites                                           | 17 (0.7)         | 1 (1.2)      | 20 (1.0)          | 2 (2.5)      |
| Chronic cough                                     | 17 (0.7)         | 1 (1.2)      | 24 (1.2)          | 2 (2.5)      |
| Constipation                                      | 17 (0.7)         | 1 (1.2)      | 24 (1.2)          | 2 (2.5)      |
| Heavy lifting                                     | 17 (0.7)         | 1 (1.2)      | 24 (1.2)          | 2 (2.5)      |
| <b>Recurrent hernia</b>                           | NA               | NA           | 32 (1.6)          | 4 (5.1)      |
| <b>Previous surgery with mesh</b>                 | NA               | NA           | 25 (1.2)          | 4 (5.1)      |
| <b>Defect location</b>                            |                  |              |                   |              |
| Supra-umbilical                                   | 37 (1.6)         | 0 (0)        | 414 (20.3)        | 20 (25.3)    |
| Peri- and infra-umbilical                         | 37 (1.6)         | 0 (0)        | 414 (20.3)        | 20 (25.3)    |
| Lateral                                           | 37 (1.6)         | 0 (0)        | 414 (20.3)        | 20 (25.3)    |
| <b>Defect Size (cm)</b>                           |                  |              |                   |              |
| 0 - 2                                             | 15 (0.7)         | 0 (0)        | 60 (2.9)          | 4 (5.1)      |
| 3 - 4                                             | 15 (0.7)         | 0 (0)        | 60 (2.9)          | 4 (5.1)      |
| 5 - 10                                            | 15 (0.7)         | 0 (0)        | 60 (2.9)          | 4 (5.1)      |
| > 10 cm                                           | 15 (0.7)         | 0 (0)        | 60 (2.9)          | 4 (5.1)      |
| <b>Postoperative outcomes</b>                     |                  |              |                   |              |
| Admission (days)                                  | 0 (0)            | 0 (0)        | 0 (0)             | 0 (0)        |
| Emergency surgery                                 | 5 (0.2)          | 1 (1.2)      | 9 (0.4)           | 1 (1.3)      |
| Any complication                                  | 80 (3.5)         | 3 (3.6)      | 50 (2.4)          | 2 (2.5)      |
| Wound complication                                | 62 (2.7)         | 3 (3.6)      | 33 (1.6)          | 1 (1.3)      |
| Surgical complication                             | 77 (3.4)         | 2 (2.4)      | 41 (2.0)          | 2 (2.5)      |
| Medical complication                              | 56 (2.5)         | 2 (2.4)      | 36 (1.8)          | 2 (2.5)      |
| Clavien Dindo                                     | 102 (4.5)        | 3 (3.6)      | 105 (5.1)         | 7 (8.9)      |

*Legend: BMI: body mass index; AAA: abdominal aortic aneurysm; ASA-score: American society of anesthesiologists score; NA: not applicable*
